# Supplementary material
Source: PubMed Central journal article supplement (PMC8130014)

Figure 1a

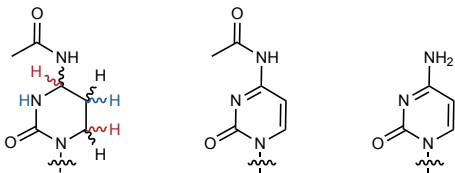

Figure S1A

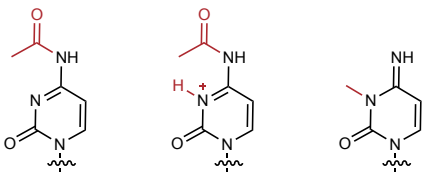

Figure S1F

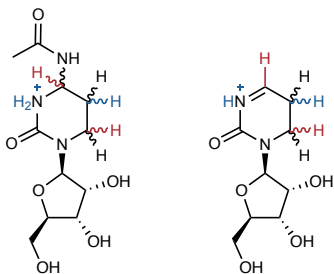

Supplement: NIHMS1686616-supplement-Supplementary_Data_1.pdf [file NIHMS1686616-supplement-Supplementary_Data_1.pdf]
